# Supplementary material for: Genetic Stability, Phenolic, Flavonoid, Ferulic Acid Contents, and Antioxidant Activity of Micropropagated Lycium schweinfurthii Plants
Source: MDPI journal article supplement (doi:10.3390/plants10102089), 2021-10-01
Supplement: s1 [file s1]

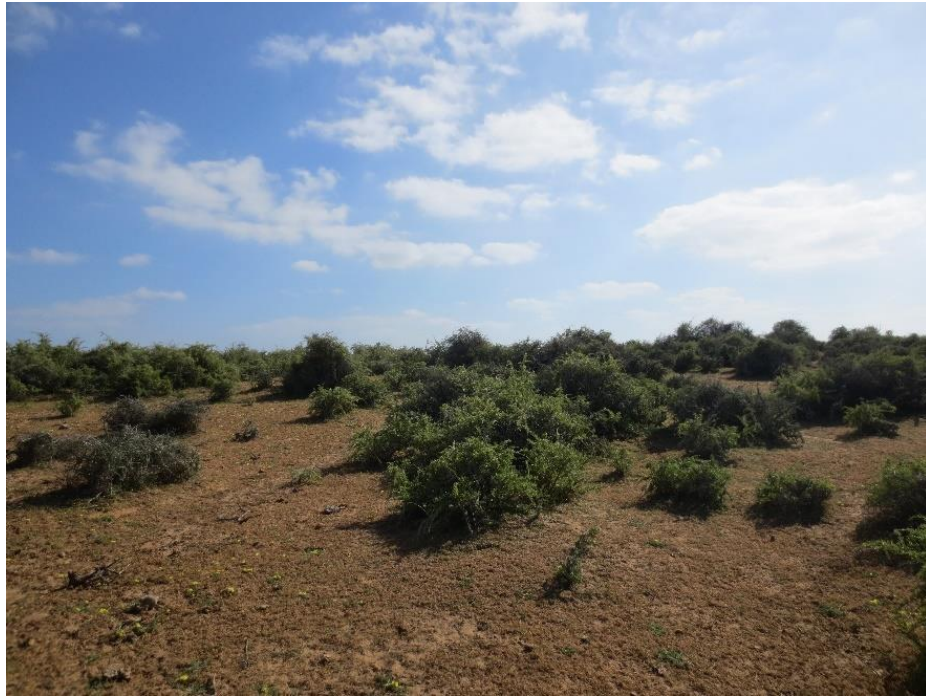

Figure S1. Jazirat Al-Kawm Al-Akhdar (the green islet) which is located in Burullus Lake (northern of Nile Delta) in Egypt showing the populations of *Lycium schweinfurthii*.

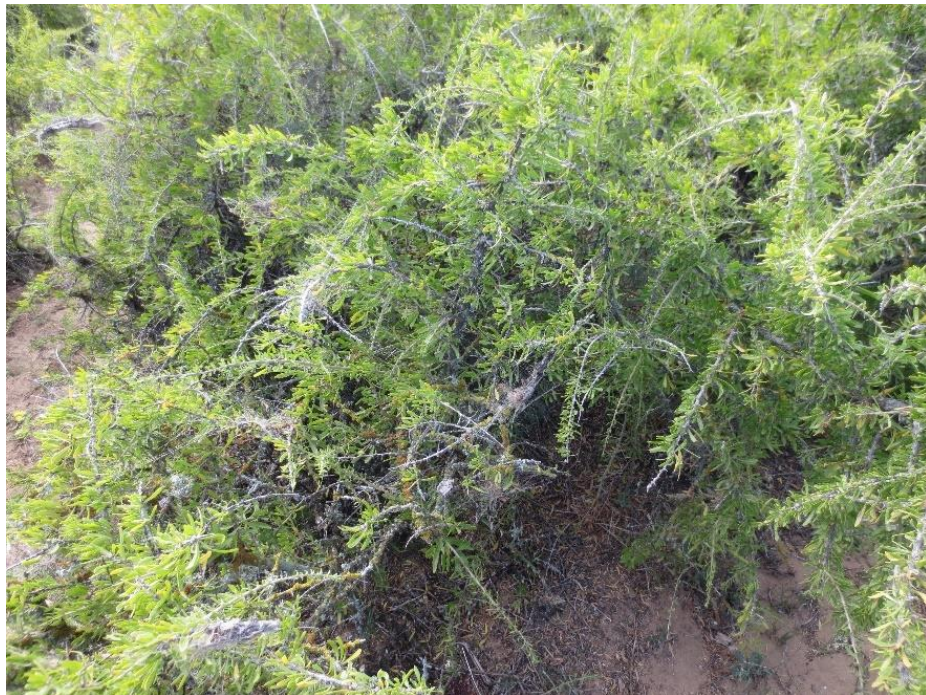

Figure S2. The blooming of *L. schweinfurthii* during the spring season.

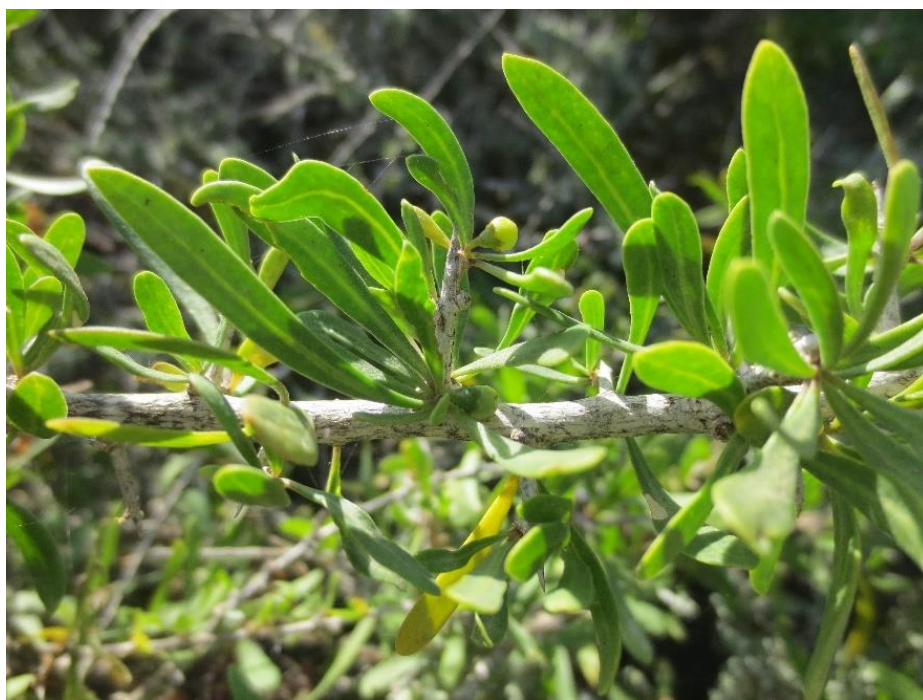

Figure S3. *L. schweinfurthii* branch showing leaves and immature fruits.

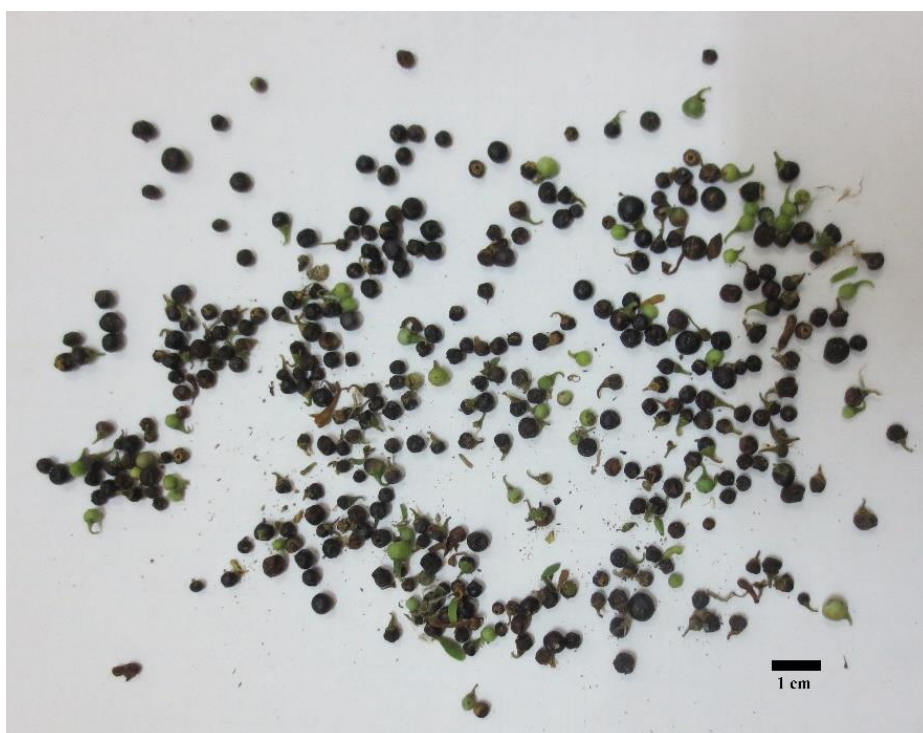

Figure S4. Ripe fruits of *L. schweinfurthii*.

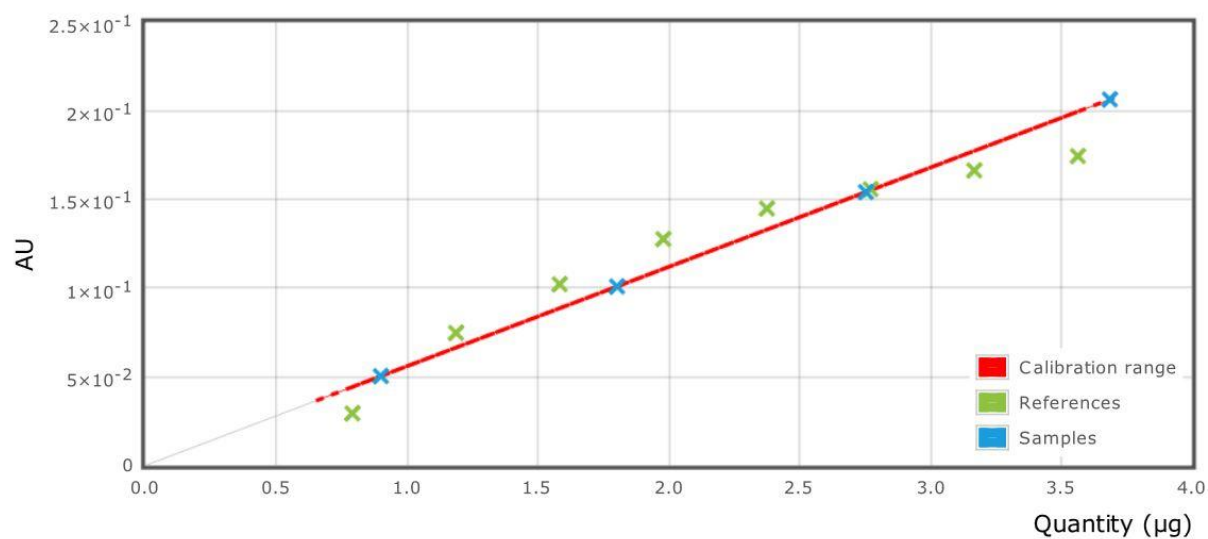

**Figure S5.** Calibration range of the HPTLC analysis of micropropagated dry leaves' extract samples against a reference of ferulic acid  $400 \mu\text{g ml}^{-1}$ .
